# Supplementary material
Source: publisher figshare collection journal article supplement (https://geolsoc.figshare.com/articles/dataset/_/3453020)
Supplement: Supplementary file 1 [file 1]

## Evolution of the Lewisian Complex: Geochronological Data

### Analytical Methods

#### *Monazite ICP-MS*

Around 200 µg of crack- and inclusion-free air-abraded monazite crystals were hand picked and divided into five roughly equal fractions (the individual fractions were not weighed) which were repeatedly cleaned in an ultrasonic bath in dilute HNO<sub>3</sub>, then ultrapure H<sub>2</sub>O. These were then transferred into clean 2 ml Savillex beakers to which a few drops of ultrapure H<sub>2</sub>SO<sub>4</sub> was added, and then heated for several hours at ~220°C until dissolved. Dissolution was confirmed by examining the solutions under a microscope. Each fraction was then split into two roughly equal aliquots to one of which a <sup>204</sup>Pb-<sup>236</sup>U tracer prepared at the University of Oxford was added and allowed to equilibrate. Both aliquots were dried down and redissolved in 2% HNO<sub>3</sub> for analysis. Because of the comparatively high U and radiogenic Pb content expected, preconcentration was not carried out, and the dissolved monazite was diluted to ~20 µg monazite/ml solution and measured directly on a Nu Plasma ICP-MS at the University of Oxford.

For the spiked aliquots, Pb and U were measured in the same analysis in alternate static steps with all beams measured on Faraday collectors. <sup>202</sup>Hg and <sup>200</sup>Hg were also measured to allow for online <sup>204</sup>Hg correction. Analyses comprised 15 cycles of alternating 10s integrations measured on U and Pb steps. Instrumental mass fractionation was estimated using bracketing U (CRM145) and Pb (SRM983) standards analysed twice between each sample. Pb in the unspiked aliquots was measured in a similar way but using ion counters for <sup>204</sup>Pb, <sup>202</sup>Hg, and <sup>200</sup>Hg. Both mass fractionation and ion counter gain on the <sup>204</sup>Pb were corrected by standard bracketing. The procedural blank was ~0.5 pg for Pb and ~0.06 pg for U.

Natural <sup>204</sup>Pb in the spiked aliquots was corrected for using the <sup>206</sup>Pb/<sup>204</sup>Pb measured in the unspiked cuts. Likewise the total non-radiogenic Pb was corrected for using the unspiked <sup>206</sup>Pb/<sup>204</sup>Pb ratio and an assumed modern day Stacey & Kramers (1975) composition. The analyses were all radiogenic, and insensitive to the choice of <sup>206</sup>Pb/<sup>204</sup>Pb and <sup>207</sup>Pb/<sup>204</sup>Pb ratios for the non-radiogenic component, hence no separate blank correction has been made.

The uncertainty in the <sup>207</sup>Pb/<sup>206</sup>Pb has been estimated from the reproducibility of the unspiked versus the spiked (after correction for minor isotopes in the spike) measurements (the reproducibility of the bracketing SRM983 standards gave an unrealistically small uncertainty of ~180 ppm), plus a 50% uncertainty on the non-radiogenic Pb correction. Uncertainties on the <sup>206</sup>Pb/<sup>238</sup>U are estimated as 50% of the total correction (i.e. mass fractionation correction plus non-radiogenic Pb correction). The uncertainty associated with the spike calibration is not propagated and is 1.1 permil (95%) on the critical <sup>236</sup>U/<sup>204</sup>Pb ratio.

The data were treated using Isoplot (Ludwig 2003) and the decay constants of Steiger & Jaeger (1977).

## Zircon TIMS

Sample preparation, analysis and data reduction follows well documented procedures (Parrish 1987; Parrish *et al.* 1987; Noble *et al.* 1993) and has not been notably modified here. Measurements were carried out on a VG354 multicollector TIMS instrument at the NERC Isotope Geology Laboratory (NIGL), Keyworth, UK. Pb and U were measured on the same filament, mostly in mixed Daly – Faraday measurements. Daly gain was determined internally by peak jumping a beam that could be measured both on the Daly and Faraday collector. Mass fractionation was corrected using typical fractionation values determined by measuring standards. U-Pb ratios were calculated with reference to a  $^{235}\text{U}/^{205}\text{Pb}$  tracer calibrated to ~1 permil uncertainty.

Blanks range from 2.1 to 7.1 pg for Pb, and 0.1 to 0.8 pg for U and have been corrected for. Common Pb has been corrected using the Stacey & Kramers (1975) model, but the analyses contain >99% radiogenic  $^{206}\text{Pb}$  so this correction is small. The decay constants of Steiger & Jaeger (1977) were used.

## Isotopic data

Isotopic data are summarised in Table 1. Details of the analysed samples are given in the main text.

## References

- Ludwig, K., 2003, Isoplot/Ex, version 3: A geochronological toolkit for microsoft Excel: Berkeley, California, Geochronology Center Berkeley.
- Noble, S. R., Tucker, R. D., Pharaoh, T. C. 1993. Lower Paleozoic and Precambrian igneous rocks from eastern England, and their bearing on late Ordovician closure of the Tornquist Sea: constraints from U-Pb and Nd isotopes. *Geological Magazine*, **130**,835-846
- Parrish, R.R. 1987. An improved micro-capsule for zircon dissolution in U-Pb geochronology. *Chemical Geology (Isotope Geoscience Section)*, **66**, 99-102.
- Parrish, R.R., Roddick, J.C., Loveridge, W. D., Sullivan, R.W. 1987. Uranium-lead analytical techniques at the geochronology laboratory, Geological Survey of Canada. In: Radiogenic Age and Isotope Studies: Report 1, Geological Survey of Canada, p 3-7.
- Stacey, J.S., Kramers, J.D., 1975. Approximation of terrestrial lead isotope evolution by a two-stage model. *Earth and Planetary Science Letters*, **26**, 207-221.
- Steiger, R.H., Jaeger, E. 1977. Subcommittee on geochronology: convention on the use of decay constants in geo- and cosmochronology. *Earth and Planetary Science Letters*, **36**, 359-362.

Table 1. U-Pb data

| Fraction No. <sup>a</sup>                                               | Fraction weight (mg) | U conc. (ppm) | Pb conc. (ppm) | $^{206}\text{Pb}/^{204}\text{Pb}$ | % non-rad. $^{206}\text{Pb}^c$ | Th/ $U^d$ | $^{206}\text{Pb}/^{238}\text{U}^e$ | $^{207}\text{Pb}/^{235}\text{U}^e$ | $^{207}\text{Pb}/^{206}\text{Pb}^e$ | $^{206}\text{Pb}/^{238}\text{U}$ age (Ma) <sup>f</sup> | $^{207}\text{Pb}/^{235}\text{U}$ age (Ma) <sup>f</sup> | $^{207}\text{Pb}/^{206}\text{Pb}$ age (Ma) <sup>f</sup> | Correlation coefficient | % discordance <sup>g</sup> |
|-------------------------------------------------------------------------|----------------------|---------------|----------------|-----------------------------------|--------------------------------|-----------|------------------------------------|------------------------------------|-------------------------------------|--------------------------------------------------------|--------------------------------------------------------|---------------------------------------------------------|-------------------------|----------------------------|
| <b>OH04-3 Ness pelite [NB 5585 6108]<sup>h</sup> - monazite</b>         |                      |               |                |                                   |                                |           |                                    |                                    |                                     |                                                        |                                                        |                                                         |                         |                            |
| 27-1(M,A,I)                                                             | -                    | -             | -              | 59382                             | 0.031                          | -         | 0.3293 ± 0.09                      | 5.169 ± 0.3                        | 0.1138 ± 0.09                       | 1835 ± 3                                               | 1848 ± 6                                               | 1861 ± 3                                                | 0.90                    | 1.6                        |
| 27-3(M,A,I)                                                             | -                    | -             | -              | 207000                            | 0.009                          | -         | 0.3426 ± 0.08                      | 5.506 ± 0.3                        | 0.1166 ± 0.05                       | 1899 ± 3                                               | 1901 ± 5                                               | 1904 ± 2                                                | 0.90                    | 0.3                        |
| 27-4(M,A,I)                                                             | -                    | -             | -              | 29053                             | 0.064                          | -         | 0.3156 ± 0.09                      | 4.852 ± 0.4                        | 0.1115 ± 0.14                       | 1768 ± 3                                               | 1794 ± 6                                               | 1824 ± 5                                                | 0.90                    | 3.5                        |
| 27-5(M,A,I)                                                             | -                    | -             | -              | 59453                             | 0.031                          | -         | 0.3394 ± 0.09                      | 5.418 ± 0.3                        | 0.1158 ± 0.08                       | 1884 ± 3                                               | 1888 ± 6                                               | 1892 ± 3                                                | 0.90                    | 0.5                        |
| <b>SH01-64 - Langavat Pegmatite [NG 0792 8639]<sup>h</sup> - zircon</b> |                      |               |                |                                   |                                |           |                                    |                                    |                                     |                                                        |                                                        |                                                         |                         |                            |
| Z26 (M,U,P)                                                             | 0.0123               | 500.6         | 165.8          | 13950                             | 0.13                           | 0.36      | 0.3163 ± 0.15                      | 4.906 ± 0.1                        | 0.1125 ± 0.11                       | 1772 ± 5                                               | 1803 ± 2                                               | 1840 ± 4                                                | 0.70                    | 4.2                        |
| Z27 (M,U,P)                                                             | 0.0144               | 1271.0        | 411.8          | 33590                             | 0.055                          | 0.36      | 0.3088 ± 0.12                      | 4.85 ± 0.1                         | 0.1139 ± 0.03                       | 1735 ± 4                                               | 1794 ± 2                                               | 1862 ± 1                                                | 0.97                    | 7.8                        |
| Z110 (U,P)                                                              | -                    | -             | -              | 2556                              | 0.73                           | 0.18      | 0.3104 ± 0.15                      | 4.572 ± 0.2                        | 0.1068 ± 0.15                       | 1743 ± 5                                               | 1744 ± 3                                               | 1746 ± 6                                                | 0.65                    | 0.2                        |
| Z111 (U,P)                                                              | -                    | -             | -              | 6319                              | 0.3                            | 0.52      | 0.335 ± 0.12                       | 5.311 ± 0.1                        | 0.115 ± 0.07                        | 1862 ± 4                                               | 1871 ± 2                                               | 1880 ± 3                                                | 0.83                    | 1.1                        |
| Z112 (A,I)                                                              | 0.0108               | 116.4         | 41.2           | 9027                              | 0.21                           | 0.52      | 0.3258 ± 0.11                      | 5.017 ± 0.1                        | 0.1117 ± 0.05                       | 1818 ± 4                                               | 1822 ± 2                                               | 1827 ± 2                                                | 0.92                    | 0.6                        |
| Z113 (A,I)                                                              | 0.0055               | 112.9         | 43.3           | 3469                              | 0.54                           | 0.72      | 0.3368 ± 0.23                      | 5.321 ± 0.2                        | 0.1146 ± 0.11                       | 1871 ± 7                                               | 1872 ± 4                                               | 1873 ± 4                                                | 0.89                    | 0.1                        |

<sup>a</sup>M=multigrain analysis, U=euhedral, A=anhedral, P=prismatic, I=irregular

<sup>b</sup>Corrected for spike contribution and instrumental bias

<sup>c</sup>Estimated percentage of non-radiogenic lead in analysis, including blank.

<sup>d</sup>Determined based on measured  $^{208}\text{Pb}/^{206}\text{Pb}$

<sup>e</sup>Determined ratios corrected for instrumental biases, spike, blank, and common lead. Errors are 1 sigma in percent.

<sup>f</sup>Errors are 2 sigma in Ma, decay constants used are those recommended by Steiger and Jaeger (1977)

<sup>g</sup>Discordance calculated with respect to the origin

<sup>h</sup>Locations given with respect to the U.K. Ordnance Survey grid system.
